# Supplementary material for: Inhibition of SHP-1 activity by PKC-θ regulates NK cell activation threshold and cytotoxicity
Source: eLife journal article supplement (doi:10.7554/elife.73282), 2022-02-24

# Figure 5-Figure supplement 2A-source data 1

**A**

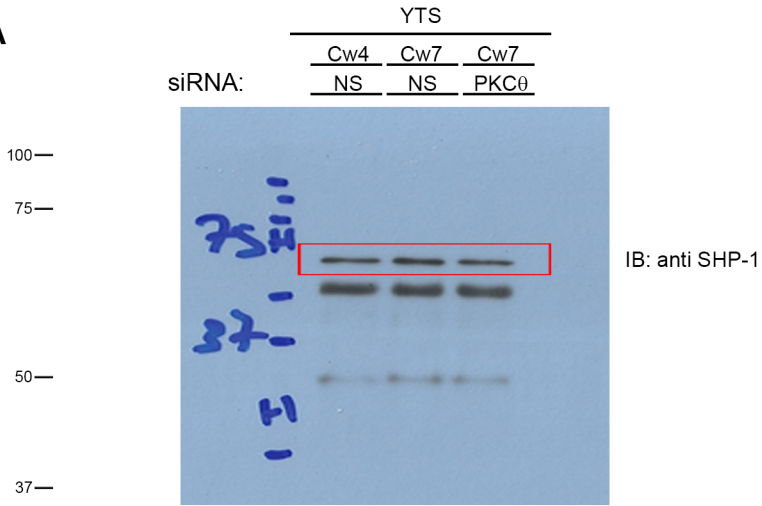

Supplement: fig5-figsupp1-data1 [file elife-73282-fig5-figsupp1-data1-v1.pdf]
