# Supplementary material for: Inhibition of SHP-1 activity by PKC-θ regulates NK cell activation threshold and cytotoxicity
Source: eLife journal article supplement (doi:10.7554/elife.73282), 2022-02-24

# Figure 6- source data 1

**A**

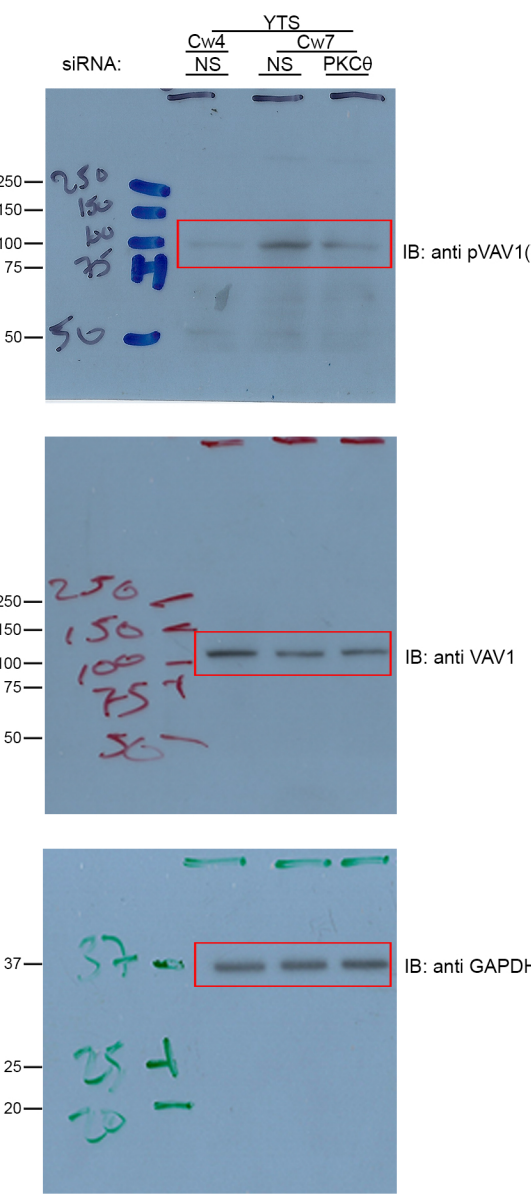

**B**

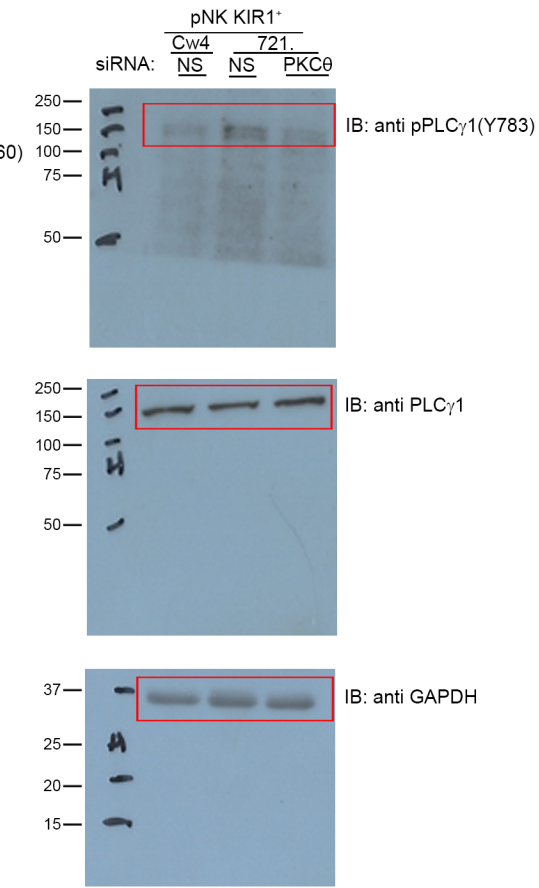

**E**

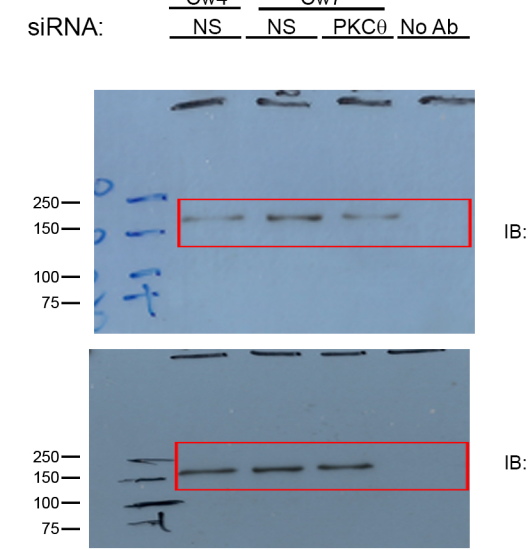

Supplement: fig6-data1 [file elife-73282-fig6-data1-v1.pdf]
