# Supplementary material for: Inhibition of SHP-1 activity by PKC-θ regulates NK cell activation threshold and cytotoxicity
Source: eLife journal article supplement (doi:10.7554/elife.73282), 2022-02-24

# Figure 7- source data 2

D

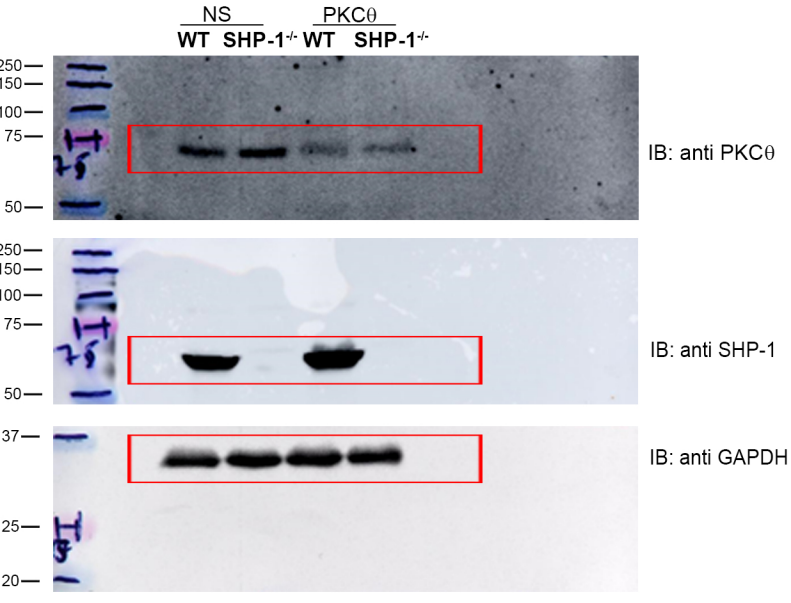

Supplement: fig7-data2 [file elife-73282-fig7-data2-v1.pdf]
