# Supplementary material for: Inhibition of SHP-1 activity by PKC-θ regulates NK cell activation threshold and cytotoxicity
Source: eLife. 2022 Mar 8;11:e73282. doi: 10.7554/eLife.73282 (PMC8903836; doi:10.7554/eLife.73282)
Supplement: Figure 1—figure supplement 1—source data 1. [file elife-73282-fig1-figsupp1-data1.xlsx]

## Sheet: Figure 1-Figure Supplement 1
		pNKS pSHP-1 s591 kinetics
			Cw4		721
			5	20	5	20
			1	3.5	1.72506	1.85628
			1	2.42389	2.56831	2.56275
			1	2.1	2.67756	2.14382
		avg	1	2.67463	2.32365	2.18762
		sdev	0	0.732907	0.521257	0.355264
		serr	0	0.423144	0.300948	0.205112
