# Supplementary material for: Inhibition of SHP-1 activity by PKC-θ regulates NK cell activation threshold and cytotoxicity
Source: eLife. 2022 Mar 8;11:e73282. doi: 10.7554/eLife.73282 (PMC8903836; doi:10.7554/eLife.73282)
Supplement: Figure 1—source data 2. [file elife-73282-fig1-data2.xlsx]

## Sheet: Dataset S1A
	Dataset S1A(figure 1)- degranulation and cytotoxicity of WT vs SHP-1-/- YTS cells
			Degranulation(MFI) YTS WT vs YTS SHP-1-/-					Specific lysis % YTS WT vs YTS SHP-1-/-
			Experiment #	WT vs Cw4	SHP1-/- vs Cw4			Experiment #	YTS WT + Cw4	YTS SHP-1 -/- + Cw4	YTS WT + Cw7	YTS SHP-1-/- + Cw7
			1	24.8	36.3			1	6.96575	29.1818	24.812	36.7783
			2	16.6	34.2			2	4.61191	28.417	28.7494	25.7005
			3	15.7	32.3			3	4.91329	33.1045	35.1072	38.045
			4	21	26.6
								Average	5.49698	30.2345	29.5562	33.508
			Avg	19.525	32.35			Stdev	1.28088	2.51479	5.19477	6.79105
			Stdev	4.2106	4.16693			Serror	0.739518	1.45192	2.9992	3.92082
			Serror	2.1053	2.08347
			Ttest	0.00493034				Ttest	0.000652715
										0.0114883
											0.852197

## Sheet: Figure 1-Source data 2
		Figure 1- Phosphorylation of SHP-1 S591 and kinetics. Densitometery of western blots and calibration
	Experiment 1						Experiment 1
	YTS						pNKs
		cw4	cw7					cw4	721
	pshp S591	23391.4	63375.7				pshp S591	12468.4	69395
	loading ctrl.	69027.2	76692.5				loading ctrl.	28983.9	72920
	calibrated	1	2.43857				calibrated	1	2.21222
	Experiment 2						Experiment 2
	YTS						pNKs
		cw4	cw7					cw4	721
	pshp S591	15717.1	20331.8				pshp S591	15355	71388
	loading ctrl.	48854.1	19071				loading ctrl.	45175.5	72985.8
	calibrated	1	3.31383				calibrated	1	2.87767
	Experiment 3						Experiment 3
	YTS						pNKs
		cw4	cw7					cw4	721
	pshp S591	64449.9	221437				pshp S591	12626.8	59802.2
	loading ctrl.	221477	221457				loading ctrl.	38025.7	73549.8
	calibrated	1	3.4361				calibrated	1	2.44861
	analysis						analysis
		Cw4	Cw7					Cw4	Cw7
		1	2.43857					1	2.21222
		1	3.31383					1	2.87767
		1	3.4361					1	2.44861
	Average	1	3.06283				Average	1	2.51283
	Stdev	0	0.544074				Stdev	0	0.337341
	Serror	0	0.314121				Serror	0	0.194764
	pSHP-1 S591 Kinetics calibrated to YTS vs Cw7 5 minutes activation
	experiment #	cw4			cw7
		5 minutes	20 minutes		5 minutes	20 minutes
	1	0.422318	1.51169		1	0.563113
	2	0.298244	1.55598		1	0.785986
	3	0.452633	1.48727		1	0.938181
	Avg	0.391065	1.51832		1	0.762426
	Stdev	0.0818017	0.0348305		0	0.188641
	Serror	0.0472282	0.0201094		0	0.108912
