# Supplementary material for: Inhibition of SHP-1 activity by PKC-θ regulates NK cell activation threshold and cytotoxicity
Source: eLife. 2022 Mar 8;11:e73282. doi: 10.7554/eLife.73282 (PMC8903836; doi:10.7554/eLife.73282)
Supplement: Figure 2—source data 1. [file elife-73282-fig2-data1.xlsx]

## Sheet: Figure 2- Source data 1 
Cell #	YTS Cw4 5 minutes	YTS Cw4 20 minutes	YTS Cw7 5 minutes	YTS Cw7 20 minutes
1	0	0	0	0
2	0	25.7352	0	0
3	0	24.6035	0	0
4	0	0	20.1694	0
5	0	0	0	0
6	0	0	22.5086	0
7	0	31.9394	21.9306	44.27
8	0	0	26.0292	0
9	0	0	29.7698	0
10	0	0	0	0
11	34.8595	0	27.1875	0
12	42.6984	0	33.192	25.52
13	0	0	30.2487	0
14	0	0	26.7044	0
15	42.9648	25.0367	0	29.13
16	0	0	0	0
17	24.0577	45.6358	24.746	0
18	43.3613	24.2782	0	0
19	43.6891	40.6051	20.4716	0
20	0	40.1771	36.5859	35.4722
21	0	27.42	24.4	25.3569
22	46.51	0	22.8301	23.4478
23	42.84	29.051	0	0
24	28.8225	22.3122	0	0
25	0	30.0769	26.8378	21.3114
26	30.0288	35.9298	38.08	0
27	0	0	31.1178	0
28	29.734	26.6367	0	0
29	0	23.4143	34.0306	0
30	0	0	35.5955	32.6533
31	0	25.5885	26.7497	27.0805
32	0	26.418	28.5338	0
33	0	23.268	0	25.196
34	43.95	20	26.51	22.2945
35	0	0	28.19	0
36	0	25.99	0	0
37	21.3163	31.1429	0	18.1671
38	0	39.6129	23.408	0
39	0	0	28.0955	21.9091
40	0	28.0926	28.7381	0
41	0	0	0	0
42	0	0	24.6569	0
43	0	29.3557	28.7335	0
44	0	28.4915	41.865	23.172
45	0	33.9297	24.7929	0
46	0	0	0	0
47	0	21.6133	34.25
48	0	17.8184	0
49	0	22.7499	0
50	26.1636	0	34.863
51	0	21.3163	0
52	0	0	0
53	24.969	0	30.4374
54	23.8	0	0
55	29.0891	0	22.0226
56	0	0	22.323
57	0	0	0
58	0	0	22.0993
59	0	26.1636	0
60	0	24.969	0
61	0	23.7977	0
62	0		0
63	0		14.49
64	0		0
65	0		0
66	0		45.65
67	0		44.95
68	0		44.61
69	0		46.07
70	0		49.77
71	20.46		47.56
72	21.07		44.7
73			0
