# Supplementary material for: Inhibition of SHP-1 activity by PKC-θ regulates NK cell activation threshold and cytotoxicity
Source: eLife. 2022 Mar 8;11:e73282. doi: 10.7554/eLife.73282 (PMC8903836; doi:10.7554/eLife.73282)
Supplement: Figure 3—figure supplement 1—source data 1. [file elife-73282-fig3-figsupp1-data1.xlsx]

## Sheet: Figure 3-Figure supplement 1
	YTS WT vs. Cw7 5 min	YTS WT vs. Cw7 20 min
1	3.17971	1.32066
2	2.33157	1.25653
3	0.843561	1.36686
4	1.32865	1.02455
5	1.26677	1.00017
6	0.922162	1.15746
7	1.04324	1.0577
8	1.13924	2.15634
9	1.68114	2.31432
10	1.47771	1.34939
11	1.07107	1.63976
12	1.08994	1.20815
13	2.3347	1.32812
14	1.72499	1.58394
15	1.80935	1.24815
16	1.31015	1.37842
17	1.75635	1.14633
18	2.03754	1.11786
19	1.15541	1.16813
20	1.17812	3.50857
21	1.96493	1.70055
22	4.46523	2.88774
23	1.59787
24	1.7492
