# Supplementary material for: Inhibition of SHP-1 activity by PKC-θ regulates NK cell activation threshold and cytotoxicity
Source: eLife. 2022 Mar 8;11:e73282. doi: 10.7554/eLife.73282 (PMC8903836; doi:10.7554/eLife.73282)
Supplement: Figure 3—source data 1. [file elife-73282-fig3-data1.xlsx]

## Sheet: Figure 3A 
Cell #	Cw4 mCherry	K562 Cerilum
1	1.58685	3.84968
2	1.60804	10.4992
3	0.933416	3.1476
4	1.33041	0.97819
5	1.04559	1.52689
6	1.24812	1.29654
7	1.13038	2.36808
8	0.491486	1.15607
9	1.32697	3.44435
10	7.38964	9.36986
11	2.59238	3.03346
12	2.48934	3.78594
13	0.972709	1.1937
14	1.16313	2.16335
15	1.40235	4.32564
16	1.04726	1.9116
17	2.08491	4.02344
18	1.49737	2.09332
19	2.21526	7.5723
20	3.22517	4.43181
21	3.76565	3.66845
22	2.49207	2.27808
23	0.733928	4.56303
24	6.56726	7.62897
25	1.99771	2.6955
26	3.58454	6.03889

## Sheet: Figure 3B
Cell #	YTS WT vs. Cw4 5 min	YTS WTvs. Cw4 20 min
1	1.45581	1.81907
2	1.27216	2.08322
3	1.0933	3.43375
4	1.37548	1.3911
5	1.11599	0.962552
6	1.07758	1.20614
7	0.958592	2.13312
8	0.976842	1.88251
9	0.877976	1.44499
10	1.27907	1.47159
11	1.10356	1.19967
12	0.916938	3.02476
13	1.26961	1.18623
14	1.07143	1.21108
15	0.924939	1.46257
16	1.19157	0.912348
17	0.839903	1.0797
18	1.17388	1.58919
19	1.13635	2.24019
20	1.12728	1.20217
21	1.51248	1.00307
22	1.85932	1.61829
23	1.36425	1.75968
24		1.12153
