# Supplementary material for: Inhibition of SHP-1 activity by PKC-θ regulates NK cell activation threshold and cytotoxicity
Source: eLife. 2022 Mar 8;11:e73282. doi: 10.7554/eLife.73282 (PMC8903836; doi:10.7554/eLife.73282)
Supplement: Figure 4—source data 2. [file elife-73282-fig4-data2.xlsx]

## Sheet: Dataset S1A
	Dataset S1A(figure 1)- degranulation and cytotoxicity of WT vs SHP-1-/- YTS cells
			Degranulation(MFI) YTS WT vs YTS SHP-1-/-					Specific lysis % YTS WT vs YTS SHP-1-/-
			Experiment #	WT vs Cw4	SHP1-/- vs Cw4			Experiment #	YTS WT + Cw4	YTS SHP-1 -/- + Cw4	YTS WT + Cw7	YTS SHP-1-/- + Cw7
			1	24.8	36.3			1	6.96575	29.1818	24.812	36.7783
			2	16.6	34.2			2	4.61191	28.417	28.7494	25.7005
			3	15.7	32.3			3	4.91329	33.1045	35.1072	38.045
			4	21	26.6
								Average	5.49698	30.2345	29.5562	33.508
			Avg	19.525	32.35			Stdev	1.28088	2.51479	5.19477	6.79105
			Stdev	4.2106	4.16693			Serror	0.739518	1.45192	2.9992	3.92082
			Serror	2.1053	2.08347
			Ttest	0.00493034				Ttest	0.000652715
										0.0114883
											0.852197

## Sheet: Dataset S1B
		Dataset S1B(figure 2)- Phosphorylation of SHP-1 S591 and kinetics. Densitometery of western blots and calibration
	Experiment 1						Experiment 1
	YTS						pNKs
		cw4	cw7					cw4	721
	pshp S591	23391.4	63375.7				pshp S591	12468.4	69395
	loading ctrl.	69027.2	76692.5				loading ctrl.	28983.9	72920
	calibrated	1	2.43857				calibrated	1	2.21222
	Experiment 2						Experiment 2
	YTS						pNKs
		cw4	cw7					cw4	721
	pshp S591	15717.1	20331.8				pshp S591	15355	71388
	loading ctrl.	48854.1	19071				loading ctrl.	45175.5	72985.8
	calibrated	1	3.31383				calibrated	1	2.87767
	Experiment 3						Experiment 3
	YTS						pNKs
		cw4	cw7					cw4	721
	pshp S591	64449.9	221437				pshp S591	12626.8	59802.2
	loading ctrl.	221477	221457				loading ctrl.	38025.7	73549.8
	calibrated	1	3.4361				calibrated	1	2.44861
	analysis						analysis
		Cw4	Cw7					Cw4	Cw7
		1	2.43857					1	2.21222
		1	3.31383					1	2.87767
		1	3.4361					1	2.44861
	Average	1	3.06283				Average	1	2.51283
	Stdev	0	0.544074				Stdev	0	0.337341
	Serror	0	0.314121				Serror	0	0.194764
	Ttest	0.0224116					Ttest	0.0161734
	pSHP-1 S591 Kinetics calibrated to YTS vs Cw7 5 minutes activation
	experiment #	cw4			cw7
		5 minutes	20 minutes		5 minutes	20 minutes
	1	0.422318	1.51169		1	0.563113
	2	0.298244	1.55598		1	0.785986
	3	0.452633	1.48727		1	0.938181
	Avg	0.391065	1.51832		1	0.762426
	Stdev	0.0818017	0.0348305		0	0.188641
	Serror	0.0472282	0.0201094		0	0.108912
	ttest
		0.000400056
			0.00596162
				0.160915

## Sheet: Dataset S1C
			Dataset S1C(figure 3)- FRET analysis YFP-SHP-1-CFP
			YTS Cw4 5 minutes		YTS Cw4 20 minutes		YTS Cw7 5 minutes		YTS Cw7 20 minutes
			Cell #	Synaptic FRET efficiency	Cell #	Synaptic FRET efficiency	Cell #	Synaptic FRET efficiency	Cell #	Synaptic FRET efficiency
			1	0	1	0	1	0	1	0
			2	0	2	25.7352	2	0	2	0
			3	0	3	24.6035	3	0	3	0
			4	0	4	0	4	20.1694	4	0
			5	0	5	0	5	0	5	0
			6	0	6	0	6	22.5086	6	0
			7	0	7	31.9394	7	21.9306	7	44.2681
			8	0	8	0	8	26.0292	8	0
			9	0	9	0	9	29.7698	9	0
			10	0	10	0	10	0	10	0
			11	34.8595	11	0	11	27.1875	11	0
			12	42.6984	12	0	12	33.192	12	25.5218
			13	0	13	0	13	30.2487	13	0
			14	0	14	0	14	26.7044	14	0
			15	42.9648	15	25.0367	15	0	15	29.1335
			16	0	16	0	16	0	16	0
			17	24.0577	17	45.6358	17	24.746	17	0
			18	43.3613	18	24.2782	18	0	18	0
			19	43.6891	19	40.6051	19	20.4716	19	0
			20	0	20	40.1771	20	36.5859	20	35.4722
			21	0	21	27.4192	21	24.4011	21	25.3569
			22	0	22	0	22	22.8301	22	32.9601
			23	0	23	29.051	23	0	23	23.4478
			24	28.8225	24	22.3122	24	0	24	0
			25	0	25	30.0769	25	26.8378	25	0
			26	30.0288	26	35.9298	26	38.08	26	21.3114
			27	0	27	0	27	31.1178	27	0
			28	29.734	28	26.6367	28	0	28	37.6847
			29	0	29	23.4143	29	34.0306	29	0
			30	0	30	0	30	35.5955	30	0
			31	0	31	25.5885	31	26.7497	31	32.6533
			32	0	32	26.418	32	28.5338	32	27.0805
			33	0	33	23.268	33	0	33	0
			34	0	34	20.383	34	26.5134	34	25.196
			35	0	35	0	35	28.1927	35	22.2945
					36	25.9897	36	0	36	0
					37	31.1429	37	0	37	0
					38	39.6129	38	23.408	38	32.7778
					39	0	39	28.0955	39	18.1671
					40	28.0926	40	28.7381	40	0
					41	0	41	0	41	0
					42	0	42	24.6569
					43	29.3557	43	28.7335
					44	28.4915	44	41.865
					45	33.9297	45	24.7929
					46	0	46	0
					47	21.6133	47	34.25
					48	17.8184	48	0
					49	22.7499
				Cw4 5 minutes		Cw4 20 minutes		Cw7 5 minutes		Cw7 20 minutes
	Average			9.14904		16.8838		18.2701		10.5689
	Stdev			16.2145		15.0476		14.3066		14.6864
	Serror			2.74075		2.14966		2.06498		2.32213
	Ttest		0.0296205
				0.00979791
					0.0145384
						0.0476942

## Sheet: Dataset S1D
				Dataset S1D(figure4)- Synapse intensity pSHP-1 S591 and PKCq
		PNK + pSHP S591 vs. Cerilium CFP						PNK + pSHP S591 vs. Cw4 cherry
			Cell #		synapse intensity	non-contact intensity	ratio		Cell #		synapse intensity	non-contact intensity	ratio						YTS WT vs. Cw4 5 min PKC synpase intensity						YTS WT vs. Cw7 5 min PKC synpase intensity						YTS WT vs. Cw4 20 mins PKC synpase intensity						YTS WT vs. Cw7 20 mins PKC synpase intensity
			1		44.306	11.509	3.84968		1		18.263	11.509	1.58685								cell #	synapse intensity	non-contact intensity	ratio			cell #	synapse intensity	non-contact intensity	ratio			cell #	synapse intensity	non-contact intensity	ratio			cell #	synapse intensity	non-contact intensity	ratio
			2		80.466	7.664	10.4992		2		12.324	7.664	1.60804								1	62.45	42.897	1.45581			1	57.416	18.057	3.17971			1	43.725	24.037	1.81907			1	27.512	20.832	1.32066
			3		25.291	8.035	3.1476		3		7.5	8.035	0.933416								2	23.264	18.287	1.27216			2	42.241	18.117	2.33157			2	60.88	29.224	2.08322			2	22.331	17.772	1.25653
			4		13.5	13.801	0.97819		4		18.361	13.801	1.33041								3	20.894	19.111	1.0933			3	158.658	18.655	8.50485			3	74.502	21.697	3.43375			3	24.125	17.65	1.36686
			5		60.755	39.79	1.52689		5		41.604	39.79	1.04559								4	25.848	18.792	1.37548			4	26.131	30.977	0.843561			4	41.349	29.724	1.3911			4	19.283	18.821	1.02455
			6		50.639	39.057	1.29654		6		48.748	39.057	1.24812								5	20.677	18.528	1.11599			5	28.534	21.476	1.32865			5	21	21.817	0.962552			5	18.085	18.082	1.00017
			7		84.055	35.495	2.36808		7		40.123	35.495	1.13038								6	17.237	15.996	1.07758			6	35.324	27.885	1.26677			6	22.743	18.856	1.20614			6	22.979	19.853	1.15746
			8		28.177	24.373	1.15607		8		11.979	24.373	0.491486								7	17.131	17.871	0.958592			7	25.578	27.737	0.922162			7	39.851	18.682	2.13312			7	17.945	16.966	1.0577
			9		29.959	8.698	3.44436		9		11.542	8.698	1.32697								8	18.391	18.827	0.976842			8	23.185	22.224	1.04324			8	51.788	27.51	1.88252			8	37.378	17.334	2.15634
			10		53.53	5.713	9.36986		10		42.217	5.713	7.38964								9	17.146	19.529	0.877976			9	27.909	24.498	1.13924			9	35.551	24.603	1.44499			9	44.546	19.248	2.31432
			11		37.715	12.433	3.03346		11		32.231	12.433	2.59238								10	26.638	20.826	1.27907			10	41.773	24.848	1.68114			10	29.448	20.011	1.47159			10	25.212	18.684	1.34939
			12		82.42	21.77	3.78594		12		54.193	21.77	2.48934								11	18.34	16.619	1.10356			11	31.187	21.105	1.47771			11	21.786	18.16	1.19967			11	30.416	18.549	1.63976
			13		35.823	30.01	1.1937		13		29.191	30.01	0.972709								12	17.74	19.347	0.916938			12	25.455	23.766	1.07107			12	65.979	21.813	3.02476			12	21.731	17.987	1.20815
			14		59.73	27.61	2.16335		14		32.114	27.61	1.16313								13	23.936	18.853	1.26961			13	25.05	22.983	1.08994			13	22.44	18.917	1.18623			13	29.382	22.123	1.32812
			15		55.325	12.79	4.32565		15		17.936	12.79	1.40235								14	18.689	17.443	1.07143			14	47.747	20.451	2.3347			14	24.643	20.348	1.21108			14	32.854	20.742	1.58394
			16		49.868	26.087	1.9116		16		27.32	26.087	1.04726								15	20.517	22.182	0.924939			15	36.825	21.348	1.72499			15	30.031	20.533	1.46257			15	20.079	16.087	1.24815
			17		55.109	13.697	4.02344		17		28.557	13.697	2.08491								16	21.907	18.385	1.19157			16	45.422	25.104	1.80935			16	20.599	22.578	0.912348			16	25.181	18.268	1.37842
			18		39.84	19.032	2.09332		18		28.498	19.032	1.49737								17	17.706	21.081	0.839903			17	35.192	26.861	1.31015			17	22.814	21.13	1.0797			17	23.149	20.194	1.14633
			19		77.919	10.29	7.5723		19		22.795	10.29	2.21526								18	21.651	18.444	1.17388			18	36.446	20.751	1.75635			18	28.653	18.03	1.58918			18	25.372	22.697	1.11786
			20		74.379	16.783	4.43181		20		54.128	16.783	3.22517								19	23.46	20.645	1.13635			19	42.827	21.019	2.03754			19	42.324	18.893	2.24019			19	20.35	17.421	1.16813
			21		37.741	10.288	3.66845		21		38.741	10.288	3.76565								20	19.671	17.45	1.12728			20	24.735	21.408	1.15541			20	23.524	19.568	1.20217			20	69.789	19.891	3.50857
			22		51.578	22.641	2.27808		22		56.423	22.641	2.49207								21	25.93	17.144	1.51248			21	26.807	22.754	1.17812			21	20.288	20.226	1.00307			21	33.948	19.963	1.70055
			23		72.68	15.928	4.56303		23		11.69	15.928	0.733928								22	30.556	16.434	1.85932			22	41.631	21.187	1.96493			22	28.655	17.707	1.61829			22	49.311	17.076	2.88774
			24		62.672	8.215	7.62897		24		53.95	8.215	6.56726								23	26.008	19.064	1.36425			23	89.068	19.947	4.46523			23	34.342	19.516	1.75968
			25		35.276	13.087	2.6955		25		26.144	13.087	1.99771														24	100.058	19.911	5.02526			24	22.176	19.773	1.12153
			26		63.04	10.439	6.03889		26		37.419	10.439	3.58454														25	30.759	19.25	1.59787
																											26	34.391	19.661	1.7492
				Average			3.80938			Average			2.15084
				Stdev			2.53137			stdev			1.66228								Average			1.1728			Average			2.07649			Average			1.6016			Average			1.5418
				Serror			0.496442			se			0.326								Stdev			0.235625			Stdev			1.65501			Stdev			0.629291			Stdev			0.639096
																					Serror			0.0491312			Serror			0.324575			Serror			0.128454			Serror			0.136256
				Ttest		0.00776185
																												Ttest		0.0105991
																															0.00403639
																																0.138204

## Sheet: Figure 4 -source data 2
			Figure4- PKCq silencing and pSHP-1S591 levels. Densitometery analysis
	Experiment 1				Experiment 2					Experiment 3
	PKC silencing efficiency YTS				PKC silencing efficiency YTS					PKC silencing efficiency YTS
		NS siRNA	pkc q siRNA			NS siRNA	pkc q siRNA				NS siRNA	pkc q siRNA
	PKC q	52908.9	12815.6		PKC q	65183.3	17594.3			PKC q	76425.9	27169.2
	loading control	74980.4	68586.3		loading control	50238.9	45927.4			loading control	63895.5	79082.1
	calibrated	1	0.264802		calibrated	1	0.29526			calibrated	1	0.287229
				analysis	NS siRNA	PKC q siRNA
					1	0.264802
					1	0.29526
					1	0.287229
				Avg	1	0.28243
				Stdev	0	0.0157862
				Serror	0	0.00911419
	Experiment 1				Experiment 2					Experiment 3
	YTS pSHP-1 s591				YTS pSHP-1 s591					YTS pSHP-1 s591
		NS siRNA	PKC q siRNA				NS siRNA	PKC q siRNA			NS siRNA	PKC q siRNA
	pshp-1 s591	43042.1	16454.5		pshp-1 s591		71509.2	26025.3		pshp-1 s591	72419.3	20911.1
	loading control	73061.6	75527		loading control		100156	73257.5		loading control	84736.8	56862.4
	calibrated	1	0.36981		calibrated		1	0.497574		calibrated	1	0.430298
					analysis	NS siRNA	PKC q siRNA
						1	0.36981
						1	0.497574
						1	0.430298
					Avg.	1	0.43256
					Stdev	0	0.063912
					Serror	0	0.0368996
Experiment 1				Experiment 2					Experiment 3				Experiment 4
PKC silencing efficiency YTS				PKC silencing efficiency YTS					PKC silencing efficiency YTS				PKC silencing efficiency YTS
	NS siRNA	pkc q siRNA			NS siRNA	pkc q siRNA				NS siRNA	pkc q siRNA			NS siRNA	pkc q siRNA
PKC q	74363.3	35595.3		PKC q	58948	27042.6			PKC q	57574.6	13173		PKC q	74809.7	20550.2
loading control	1	1		loading control	69558.8	42929.2			loading control	82480.9	58540.7		loading control	52889.4	37211.7
calibrated	1	0.478667		calibrated	1	0.743327			calibrated	1	0.322366		calibrated	1	0.390434
					pNK silencing efficiency
						NS siRNA	PKC siRNA
						1	0.478667
						1	0.743327
						1	0.322366
						1	0.390434
					avg	1	0.483698
					Stdev	0	0.184534
					Serror	0	0.0922672
	Experiment 1 pSHP-1 s591 pNKs				Experiment 2 pSHP-1 s591 pNKs				Experiment 3 pSHP-1 s591 pNKs
		NS siRNA	PKC q siRNA		NS siRNA	PKC q siRNA			NS siRNA	PKC q siRNA
	pshp-1 S591	68211.6	25114.1		15785.9	17886.8			66201.5	37165.8
	Loading control	81332.7	57124		11095.3	19655.5			73969.7	54410.7
	Calibrated	1	0.52421		1	0.639617			1	0.763213
			analysis	NS siRNA	PKC q siRNA
				1	0.52421
				1	0.639617
				1	0.763213
			Avg.	1	0.642347
			Stdev	0	0.119525
			Serror	0	0.0690076
