# Supplementary material for: Inhibition of SHP-1 activity by PKC-θ regulates NK cell activation threshold and cytotoxicity
Source: eLife. 2022 Mar 8;11:e73282. doi: 10.7554/eLife.73282 (PMC8903836; doi:10.7554/eLife.73282)
Supplement: Figure 5—figure supplement 1—source data 2. [file elife-73282-fig5-figsupp1-data2.xlsx]

## Sheet: Figure 5-Figure Supplement 1
% PTP Activity
NS siRNA Cw4	NS siRNA Cw7	PKCθ siRNA Cw7
100	51.6582	76.5235
100	73.065	82.8173
100	68.0272	74.6269
100	67.8519	93.4597
