# Supplementary material for: Inhibition of SHP-1 activity by PKC-θ regulates NK cell activation threshold and cytotoxicity
Source: eLife. 2022 Mar 8;11:e73282. doi: 10.7554/eLife.73282 (PMC8903836; doi:10.7554/eLife.73282)
Supplement: Figure 5—source data 1. [file elife-73282-fig5-data1.xlsx]

## Sheet: Figure 5 
Cell #	YTS NS siRNA vs. Cw4	YTS PKCθ siRNA vs. Cw4	YTS NS siRNA vs. Cw7	YTS PKCθ siRNAvs. Cw7
1	0	29.83	0	0
2	0	0	0	24.1
3	0	0	0	0
4	28.8225	0	20.1694	0
5	0	0	0	0
6	30.0288	0	22.5086	25.12
7	0	0	21.9306	0
8	29.734	0	26.0292	0
9	0	0	29.7698	0
10	0	0	0	22.45
11	0	0	27.1875	21.24
12	0	0	33.192	0
13	0	0	30.2487	0
14	43.95	0	26.7044	0
15	0	28.47	0	35.32
16	0	0	22.8301	23.62
17	21.3163	22.97	0	0
18	0	22.4344	0	0
19	0	28.4422	26.8378	22.23
20	0	0	38.08	24.67
21	0	28.1091	31.1178	0
22	0	24.054	0	0
23	0	0	34.0306	44
24	0	28.4929	35.5955	0
25	0	24.9663	26.7497	28.8704
26	0	28.6774	28.5338	26.3858
27	0	29.1641	0	35.5192
28	0	22.4106	26.51	28.2143
29	0	26.4615	28.19	0
30	26.1636	0	0	27.6984
31	0	0	0	0
32	0	0	23.408	0
33	24.969	0	28.0955	23.3389
34	23.8	0	28.7381	25.2419
35	29.0891	0	0	26.3
36	0	0	24.6569	0
37	0	0	28.7335	0
38	0	0	41.865	0
39	0	0	24.7929	23.9927
40	0	0	0	0
41	0	0	34.25	0
42	0	0	0	26.0227
43	0	0	0	41.5909
44	0	0	34.863	15.2799
45	0	0	0	0
46	0	0	0	0
47	0	0	30.4374	0
48	0	0	0	0
49	0	12.5	22.0226	12.9611
50	0	0	22.323	0
51	20.46	0	0	0
52	21.07	0	22.0993	0
53		19.01	0	0
54		18.33	0	0
55		0	0	0
56		0	0	0
57		0	14.49	0
58		19.27	0	0
59		0	0	14.5342
60		14.66	45.65	0
61		15.5	44.95	0
62		0	44.61
63		0	46.07
64			49.77
65			47.56
66			44.7
67			0
	0.75	0.714286	0.41791	0.639344
