# Supplementary material for: Inhibition of SHP-1 activity by PKC-θ regulates NK cell activation threshold and cytotoxicity
Source: eLife. 2022 Mar 8;11:e73282. doi: 10.7554/eLife.73282 (PMC8903836; doi:10.7554/eLife.73282)
Supplement: Figure 6—source data 2. [file elife-73282-fig6-data2.xlsx]

## Sheet: Figure 6A
				Figure 6A- SHP-1 substrate phosphorylation
			YTS pVAV1 Y160 calibrated to Cw7 NS siRNA sample					pNKs pVAV1 Y160 calibrated to Cw4 sample
			Cw4 NS siRNA	Cw7 NS siRNA	Cw7 PKC siRNA			Cw4 NS siRNA	721 NS siRNA	721 PKC siRNA
			0.160958	1	0.449262			1	1.8	0.5
			0.280883	1	0.49635			1	1.3	0.8
			0.315153	1	0.56738			1	1.2	0.9
								1	1.6	1.4
		Average	0.252331	1	0.50433
		Stdev	0.0809656	0	0.0594621		Avg	1	1.475	0.9
		Serror	0.0467455	0	0.0343305		Stdev	0	0.275379	0.374166
							Serror	0	0.137689	0.187083
							Ttest	0.0409427

## Sheet: Figure 6B
		Figure 6A- SHP-1 substrate phosphorylation
	pNK pPLCg1 Y873 calibrated to Cw4 sample
	Cw4 NS siRNA	Cw7 NS siRNA	Cw7 PKC siRNA
	1	2.02443	0.792126
	1	1.95547	1.13801
	1	1.97935	1.43789
Avg	1	1.98642	1.12268
Stdev	0	0.0350156	0.323154
Serror	0	0.0202163	0.186573

## Sheet: Figure 6C
Cell #	WT Cw4 NS siRNA	WT Cw4 PKC siRNA	S591D Cw4 NS siRNA	S591D Cw4 PKC siRNA	WT Cw7 NS siRNA	WT Cw7 PKC siRNA	S591D Cw7 NS siRNA	S591D Cw7 PKC siRNA
1	0.853483	0.902407	1.55772	2.20304	5.02341	1.3196	3.62539	3.34965
2	1.06991	1.19911	2.98199	4.00596	3.75731	0.988905	2.34306	1.63904
3	1.06861	1.4508	1.61994	4.99411	2.58069	1.45333	3.28277	2.02884
4	1.99537	1.20032	4.26368	1.45765	2.89015	0.615348	1.77858	2.27149
5	0.440386	1.36424	3.86842	2.77596	1.74635	1.97847	2.967	4.97836
6	0.402526	1.00931	2.39003	1.30963	1.7647	1.16248	3.38652	3.41962
7	1.16952	1.04873	1.48359	3.19114	3.42788	1.47159	1.62306	3.2705
8	1.06594	2.24862	2.56671	2.55667	3.32083	1.65615	1.63693	2.35811
9	1.89591	1.36381	5.76443	4.42241	1.77708	1.42501	2.44673	2.84314
10	0.48232	2.06373	1.60534	3.21334	2.308	1.19422	2.97287	4.33538
11	1.06858	1.02043	3.81828	2.03103	1.68064	1.78144	3.35358	2.20242
12	0.744651	1.14822	2.72517	0.615252	2.03917	1.62203	4.14549	5.57786
13	2.13747	1.37763	4.67044	3.98461	4.59464	2.46689	3.34747	2.53727
14	1.7932	2.03684	3.61031	3.87611	2.67836	1.04346	2.48898	3.17918
15	0.74341	2.08703	3.19751	2.01085	3.04454	1.70877	2.47674	2.36576
16	1.2491	1.37375	1.26771	3.23266	3.37134	1.34469	2.91128	2.59818
17	0.664724	1.73492	1.64662	3.57252	3.0109	2.45304	4.1439	4.40073
18	0.60825	1.24516	3.41627	5.15644	2.00894	0.638112	2.41206	3.34041
19	1.1609	1.33178	2.09975		4.41894	0.992097	3.0276	5.53386
20	0.797239	1.19655	3.28104		2.82256		1.6421	5.63807
21					3.21514		2.56737	3.58398
22					3.41498		4.85365
23					2.1395		2.36421
24					3.88387		1.60028
25					2.7179		3.2876
26					3.04289		4.07491
27					2.71432		4.49958
28					2.05282
29					4.20659

## Sheet: Figure 6D
Cell #	WT Cw4	SHP-1 S591D	SHP-1 S591A
1	0.702531	1.19154	0.427081
2	0.773745	1.66472	0.583572
3	0.956557	1.50067	0.164345
4	0.471159	1.18895	0.644232
5	0.42218	1.66881	0.292778
6	0.807984	1.70494	0.849842
7	0.781069	0.527374	0.791821
8	0.419947	1.21244	0.994341
9	0.0431342	1.52597	0.618697
10	0.459193	1.22256	0.623414
11	0.223629	1.4768	0.883459
12	0.059988	2.13125	0.468817
13	0.181825	2.64769	0.784031
14	0.123956	2.77193	0.565799
15	0.631898	1.45571	0.211987
16	0.537583	0.686749	1.35819
17	0.307799	2.59957	0.992835
18	0.760992	2.1974	0.084132
19	1.73751	1.57285	1.00693
20	1.15928	2.66259	0.251763
21	0.309434	3.63129	1.32419
22	0.285587	1.48551	0.677461
23	0.782485	3.1728	0.464992
24	1.57378	1.3838
25	1.45122	1.19533
26	1.28406	1.66492
27	0.67318
28	0.122398
29	0.667378
30	0.0158643
31	1.04263
32	0.877479
33	0.476425
34	0.76806
35	0.30811
36	1.13775
37	0.326194
38	0.613208
39	0.717727
40	0.530178
41	0.448463
42	1.1151
43	0.624675
44	2.03946
45	0.822091
46	0.402533
47	0.633243
48	0.490942
49	0.0790803

## Sheet: Figure 6E
	YTS relative pPLCg-1 Y783
	NS sirNA Cw4	NS siRNA Cw7	PKC siRNA Cw7
	0.8	1	0.6
	0.6	1	0.6
	0.5	1	0.7
avg	0.633333	1	0.633333
dev	0.152753	0	0.057735
error	0.0881917	0	0.0333333
