# Supplementary material for: Inhibition of SHP-1 activity by PKC-θ regulates NK cell activation threshold and cytotoxicity
Source: eLife. 2022 Mar 8;11:e73282. doi: 10.7554/eLife.73282 (PMC8903836; doi:10.7554/eLife.73282)
Supplement: Figure 7—figure supplement 1—source data 1. [file elife-73282-fig7-figsupp1-data1.xlsx]

## Sheet: Figure 7-Figure Supplement 1A
	Time (sec)	pNK NS siRNA Cw4	pNK NS siRNA 721	pNK PKCθ siRNA 721
	0	1.00506	1.00888	1.02184
	11	0.968649	1.0165	0.987739
	22	0.959345	0.993428	0.925711
	33	0.960761	0.940111	0.846634
	44	0.947816	0.910733	0.767012
	55	0.9375	0.93293	0.735454
	66	1.0087	1.04392	0.849898
	77	1.28459	1.3834	1.21445
	88	1.68204	1.8898	1.68601
	99	1.90494	2.2208	1.95226
	110	1.89927	2.25888	1.97602
	121	1.84223	2.19055	1.93648
	132	1.80825	2.14224	1.91762
	143	1.80542	2.11133	1.90837
	154	1.82868	2.08805	1.89749
	165	1.82706	2.08391	1.89296
	176	1.80016	2.10328	1.89441
	187	1.7947	2.12548	1.89822
	198	1.79672	2.11482	1.89459
	209	1.76881	2.07282	1.87228
	220	1.72654	2.04561	1.85995
	231	1.71723	2.0541	1.88062
	242	1.74555	2.05932	1.91109
	253	1.77043	2.03495	1.91563
	264	1.78863	2.00971	1.88679
	275	1.81088	2.00753	1.85432
	286	1.8218	2.02755	1.83709
	297	1.81452	2.04518	1.84018
	308	1.78641	2.0356	1.85741
	319	1.76052	2.01602	1.83691
	330	1.76011	1.9973	1.76146
	341	1.74879	1.97162	1.70578
	352	1.70975	1.95117	1.7076
	363	1.67961	1.94181	1.7183
	374	1.67921	1.93615	1.71267
	385	1.69195	1.9368	1.69943
	396	1.68345	1.93419	1.67332
	407	1.6604	1.90612	1.64393
	418	1.65797	1.8663	1.6394
	429	1.66707	1.8454	1.66407
	440	1.66849	1.84932	1.69508
	451	1.68204	1.86455	1.71376
	462	1.70732	1.86695	1.70941
	473	1.6871	1.8589	1.66951
	484	1.62803	1.86434	1.61999
	495	1.61266	1.87282	1.61818
	506	1.63532	1.86738	1.66389
	517	1.64927	1.8565	1.69399
	528	1.66505	1.84062	1.67422
	539	1.67193	1.82168	1.63505
	550	1.65756	1.81755	1.60947
	561	1.64907	1.81494	1.60657
	572	1.63875	1.78491	1.63015
	583	1.61509	1.7577	1.65228
	594	1.62561	1.77033	1.6345
	605	1.68689	1.7873	1.60349
	616	1.73362	1.78425	1.60748
	627	1.71804	1.79775	1.63269
	638	1.67536	1.84845	1.64865
	649	1.66161	1.9009	1.64321
	660	1.66828	1.89284	1.61328
	671	1.65453	1.83278	1.59243
	682	1.63511	1.80884	1.60476
	693	1.65089	1.82669	1.61909
	704	1.6871	1.81842	1.61655
	715	1.6962	1.79492	1.61854
	726	1.67314	1.79905	1.63305
	737	1.65898	1.82342	1.64611
	748	1.6877	1.838	1.64901
	759	1.73503	1.82234	1.6365
	770	1.72876	1.78969	1.6131
	781	1.65574	1.77707	1.59805
	792	1.58879	1.80971	1.60512
	803	1.55906	1.86194	1.6414
	814	1.54025	1.86891	1.70016
	825	1.54288	1.8206	1.73299
	836	1.57544	1.77707	1.69762
	847	1.60376	1.76815	1.6414
	858	1.61104	1.7638	1.6365
	869	1.60538	1.73812	1.66497
	880	1.60518	1.70722	1.66479
	891	1.62642	1.7107	1.63432
	902	1.6432	1.74595	1.62217
	913	1.62581	1.76423	1.64121
	924	1.60498	1.7651	1.65808
	935	1.62035	1.78382	1.65899
	946	1.65655	1.79753	1.65155
	957	1.6871	1.77403	1.63505
	968	1.70388	1.7503	1.61872
	979	1.6873	1.76423	1.61981
	990	1.64664	1.78643	1.63994
	1001	1.6339	1.78251	1.66788
	1012	1.63612	1.77533	1.69309
	1023	1.60821	1.79056	1.7056
	1034	1.59587	1.80297	1.68384
	1045	1.64361	1.79339	1.63251
	1056	1.69741	1.79296	1.59605
	1067	1.71278	1.81646	1.58535
	1078	1.70813	1.8256	1.59424
	1089	1.69417	1.80297	1.63305
	1100	1.67759	1.78686	1.6842
	1111	1.66181	1.8058	1.72664
	1122	1.64037	1.83996	1.7475
	1133	1.63451	1.85781	1.73607
	1144	1.64624	1.84497	1.71231
	1155	1.66363	1.81972	1.69472
	1166	1.69013	1.8071	1.67912
	1177	1.68345	1.79143	1.655
	1188	1.63026	1.7762	1.6316
	1199	1.59324	1.78752	1.62852
	1210	1.58252	1.79731	1.63487
	1221	1.5718	1.78099	1.64647
	1232	1.58252	1.7614	1.65699
	1243	1.62419	1.75575	1.63741
	1254	1.65777	1.75596	1.60784
	1265	1.65837	1.75596	1.60313
	1276	1.65271	1.77642	1.61129

## Sheet: Figure 7-Figure Supplement 1B
Relative MFI pNK CD107a
sample	1	2	3	Avg	Sdev	Serror
pNK NS siRNA vs. cw4	1	1	1	1	0	0
pNK NS siRNA vs. cw7	3.29541	2.44043	2.2	2.64528	0.575719	0.332391
pNK +PKC siRNA vs. cw7	1.496	1.76467	0.9	1.38689	0.442541	0.255501
