# Supplementary material for: Inhibition of SHP-1 activity by PKC-θ regulates NK cell activation threshold and cytotoxicity
Source: eLife. 2022 Mar 8;11:e73282. doi: 10.7554/eLife.73282 (PMC8903836; doi:10.7554/eLife.73282)
Supplement: Figure 7—source data 1. [file elife-73282-fig7-data1.xlsx]

## Sheet: Figure 7A
Time (sec)	YTS NS siRNA Cw7	YTS NS siRNA Cw4	YTS PKCθ siRNA Cw7
0	0.961242	0.985303	1.02039
11	1	1.07568	1.09796
22	1.15818	1.10909	1.14432
33	1.46155	1.02193	1.07049
44	1.94704	0.957358	1.03539
55	2.62221	1.16819	1.26643
66	3.30768	1.71649	1.78433
77	3.71337	2.29916	2.38877
88	3.78145	2.57789	2.89864
99	3.74609	2.60429	3.25973
110	3.78734	2.62058	3.43941
121	3.87637	2.64947	3.45878
132	3.96043	2.56742	3.43702
143	4.03982	2.41985	3.39574
154	4.09979	2.43281	3.23893
165	4.14265	2.67504	3.00567
176	4.20135	2.93545	2.863
187	4.23514	3.02975	2.87832
198	4.13931	2.97267	3.00321
209	3.90934	2.83961	3.16946
220	3.6837	2.6748	3.27831
231	3.59984	2.54138	3.24282
242	3.68075	2.53246	3.11293
253	3.84725	2.64269	3.02337
264	3.98148	2.73152	3.02504
275	3.98889	2.70619	3.08895
286	3.84649	2.59965	3.18328
297	3.63444	2.46456	3.23687
308	3.50959	2.32175	3.16065
319	3.57701	2.19951	2.98765
330	3.77846	2.17002	2.86442
341	3.95571	2.26051	2.85641
352	4.00832	2.37502	2.87776
363	3.95982	2.43008	2.84751
374	3.90057	2.4277	2.80138
385	3.90016	2.37086	2.79884
396	3.96484	2.28251	2.81861
407	4.04424	2.23221	2.80821
418	4.07452	2.25861	2.76058
429	4.03805	2.32758	2.69658
440	3.96931	2.36194	2.63934
451	3.89331	2.3208	2.62671
462	3.79931	2.24862	2.68031
473	3.68846	2.20308	2.757
484	3.59882	2.18524	2.78892
495	3.56448	2.1718	2.76383
506	3.58553	2.15765	2.73175
517	3.63687	2.15373	2.73533
528	3.67994	2.15813	2.75589
539	3.69095	2.14731	2.75184
550	3.68283	2.12174	2.72374
561	3.67264	2.11568	2.70214
572	3.65924	2.1328	2.70262
583	3.63961	2.13375	2.71461
594	3.60826	2.09891	2.71286
605	3.57402	2.06098	2.69245
616	3.57797	2.07406	2.69293
627	3.62642	2.14445	2.74438
638	3.65031	2.18643	2.80496
649	3.60253	2.1202	2.81314
660	3.52795	2.01365	2.77892
671	3.48595	1.99962	2.75502
682	3.47489	2.10498	2.75025
693	3.47631	2.26491	2.73239
704	3.50594	2.38644	2.67761
715	3.5622	2.38799	2.5921
726	3.58081	2.29012	2.51937
737	3.51725	2.20141	2.50897
748	3.43278	2.17335	2.56272
759	3.42086	2.15682	2.63489
770	3.47966	2.10391	2.67356
781	3.53089	2.03815	2.66109
792	3.53632	2.00747	2.62616
803	3.5241	2.00747	2.59924
814	3.52364	1.98844	2.58313
825	3.53541	1.93874	2.59019
836	3.55306	1.90818	2.63727
847	3.58168	1.92161	2.67721
858	3.63281	1.93802	2.62941
869	3.69546	1.9291	2.50198
880	3.7116	1.92708	2.4052
891	3.62728	1.97203	2.44434
902	3.48914	2.0561	2.62187
913	3.41848	2.11746	2.81314
924	3.45602	2.09249	2.87903
935	3.5174	1.99879	2.81877
946	3.52841	1.93434	2.72072
957	3.51223	1.96383	2.6156
968	3.52055	2.03803	2.50588
979	3.54728	2.06062	2.4418
990	3.53967	2.00842	2.45546
1001	3.47727	1.93921	2.50873
1012	3.40371	1.90128	2.55288
1023	3.36419	1.89141	2.58043
1034	3.35806	1.89724	2.61496
1045	3.36638	1.9234	2.67086
1056	3.38028	1.96502	2.7285
1067	3.4094	1.99653	2.75367
1078	3.47261	2.00414	2.7212
1089	3.54647	2.00782	2.62568
1100	3.56671	2.02269	2.5108
1111	3.52816	2.02816	2.45601
1122	3.49696	2.01246	2.48396
1133	3.49077	1.9932	2.53374
1144	3.45891	1.97857	2.5547
1155	3.39605	1.9599	2.55566
1166	3.36384	1.9322	2.55121
1177	3.38525	1.90818	2.53501
1188	3.40797	1.91258	2.51199
1199	3.4028	1.95075	2.49635
1210	3.42162	1.99974	2.48714
1221	3.50426	2.03434	2.48039
1232	3.60354	2.04837	2.47872
1243	3.66005	2.04802	2.48372
1254	3.66442	2.03494	2.49865
1265	3.61511	2.00889	2.52429
1276	3.51989	1.96858	2.54502
1287	3.43806	1.91543	2.53176
1298	3.42238	1.87869	2.47864
1309	3.45353	1.89212	2.43164
1320	3.49792	1.93125	2.43545
1331	3.55332	1.93886	2.46657
1342	3.59695	1.90925	2.47451
1353	3.58264	1.88356	2.45236
1364	3.50928	1.88392	2.42672
1375	3.42664	1.89938	2.4233
1386	3.38134	1.90889	2.45133
1397	3.38499	1.90045	2.49309
1408	3.41756	1.8882	2.52072
1419	3.44572	1.89557	2.52429
1430	3.44262	1.91935	2.51755
1441	3.41203	1.93695	2.52271
1452	3.38723	1.93481	2.53509
1463	3.38337	1.92114	2.52469
1474	3.38768	1.91472	2.50016
1485	3.40239	1.90996	2.50405
1496	3.43091	1.8882	2.52819
1507	3.44039	1.87452	2.52064
1518	3.39722	1.9058	2.46491
1529	3.31372	1.95348	2.39075
1540	3.23671	1.97596	2.33462
1551	3.19866	1.99332	2.31025
1562	3.19075	2.02614	2.30564
1573		2.05182
1584		2.0586

## Sheet: Figure 7B
YTS WT Mock + Cw4	YTS WT Mock + Cw7	YTS PKCθ siRNA + Cw4	YTS PKCθ siRNA + Cw7
14.5922	42.172	6.24932	27.1291
7.70143	42.7899	9.94003	22.8423
16.5307	41.3753	8.53486	16.8981

## Sheet: Figure 7C
NS siRNA vs. Cw4	PKCθ siRNA vs. Cw4	NS siRNA vs. 721	PKCθ siRNA vs. 721
11.7553	7.19483	19.6916	7.10247
11.4702	0.364719	16.0095	2.30202
7.66056	3.31497	17.5278	7.1297

## Sheet: Figure 7D
	WT NS Cw4	WT PKC siRNA Cw4	SHP-1-/- NS Cw4	SHP-1-/- PKC siRNA Cw4
	1	0.611111	2.33333	2.58333
	1	0.677419	2.6129	3.16129
	1	0.590909	1.70455	2.22727
	1	0.111111	1.44444	3.24444
avg	1	0.497638	2.02381	2.80409
sdev	0	0.26032	0.541735	0.484065
serror	0	0.13016	0.270867	0.242032

## Sheet: Figure 7E
	WT NS Cw4	WT NS Cw7	WT PKC siRNA Cw7	SHP-1 S591D NS Cw7	SHP-1-/- PKC siRNA Cw4
	1	2.16861	1.37396	1.92154	2.28214
	1	2.64782	0.917609	2.15832	1.8126
	1	2.51297	0.746398	1.85303	1.72478
	1	1.33957	0.990991	1.21275	1.44075
	1	1.37307	1.11922	1.49229	1.46715
avg	1	2.00841	1.02964	1.72759	1.74548
sdev	0	0.620501	0.234973	0.373932	0.340317
serror	0	0.277497	0.105083	0.167227	0.152194
