# Supplementary material for: Inhibition of SHP-1 activity by PKC-θ regulates NK cell activation threshold and cytotoxicity
Source: eLife. 2022 Mar 8;11:e73282. doi: 10.7554/eLife.73282 (PMC8903836; doi:10.7554/eLife.73282)
Supplement: Figure 8—source data 1. [file elife-73282-fig8-data1.xlsx]

## Sheet: Figure 8B
		YTS w.t/Cw4																					YTS-SHP-1 S591D/Cw4																				YTS SHP-1 KO/Cw4
		Tumor volume(mm3)																					Tumor volume(mm3)																				Tumor volume(mm3)
		1	2	3	4	5	6	7	8	9	10	11	12	13	14	15	16	17	Average	S.D	S.E		1	2	3	4	5	6	7	8	9	10	11	12	13	14	15	16	Average	S.D	S.E		1	2	3	4	5	6	7
0	First injection	123.008	214.242	114.464	81.9315	128.374	70.8295	99.144	107.217	70	100.92	127.008	69.629	80.631	78.292	28.7875	35.7435	26.568	91.5759	45.1458	10.9495		84.564	69.12	74.88	62.9565	74.1285	60.025	57.132	54.208	83.824	25.725	98.3125	85.176	34.983	26.01	27.216	26.136	59.0248	24.4808	6.12021		122.786	87.88	75	16.2	107.942	83.942	93.636
3	Second injection	143.65	245.134	149.916	83.232	147.456	94.192	112.896	117.74	78.416	104.284	159.359	94.77	108.842	102.739	36.822	51.6375	44.528	110.33	50.1392	12.1605		87.48	69.12	85	75.429	84.27	65	62.9565	81.25	104.284	46.225	112.694	117.74	52.65	28.7875	30.324	41.067	71.5173	27.3034	6.82584		146.072	97.686	88.837	25.92	129.96	108.147	106.742
4		194.4	371.2	279.864	99.825	227.812	138.915	257.032	199.962	107.217	172.827	213.564	121.835	142.884	141.288	49.923	58.5385	51.842	166.408	87.0213	21.1058		88.938	69.12	86.25	81.12	84.27	65	67.968	99.144	104.284	77.064	122.4	175.338	78.03	29.808	31.768	42.4	81.4313	35.3165	8.82913		292.032	110.466	127.832	46.746	164.775	126.711	121.014
5		246.054	396.716	361.25	110.466	255.528	235.468	291.688	298.116	183.299	242.592	261.612	154.213	170.582	195.271	76.25	63.36	62.426	212.052	98.9084	23.9888		88.938	69.12	87.5	81.12	92.2625	67.5	67.968	109.76	111.6	128.374	138.915	249.158	128.797	32.1715	39.5035	45.387	96.1297	51.8722	12.9681		364.863	126	200.9	66.27	199.838	146.979	128.304
6	Third injection	297.3	402.54	534.2	118.4	301.5	235.5	332.1	321.4	201.3	251.4	287.6	178.9	187.4	210.5	105.056	69.629	67.5	241.307	122.009	29.5916		88.938	72.03	98.315	81.12	98.3125	67.5	78.03	175.338	144.868	129.8	151.3	275.1	154.3	34.656	43.218	46.2275	108.691	61.5359	15.384		398.7	129.77	205.2	70.4	223.5	153.2	136.9
7		336.518	522.786	641.144	127.8	356.445	235.67	379.906	390.15	229.147	261.612	306.561	193.55	196	229.365	112.091	73.75	71.5275	274.354	154.116	37.3786		88.938	75	98.315	81.12	104.363	68.75	85.6745	233.28	166.888	131.4	160.55	298.116	178.024	38.7855	47.1495	53.621	119.373	71.7501	17.9375		437.4	133.956	211.722	76.832	249.018	168.683	147.829
8		376.2	675.3	698.2	142.5	377.9	267.4	413.57	402.1	245.3	277.55	330.5	211.5	234.8	255.6	113.715	81.12	77.064	304.725	178.692	43.3391		88.938	80.631	102.06	81.12	119.422	68.75	85.6745	255.938	173.225	130.2	170.5	345.12	198.6	39.546	53.6625	55.47	128.054	82.8559	20.714		477.21	147.3	288.7	81.3	274.5	198.4	165.4
9	Forth injection	444.5	803.2	743.1	159.4	405.3	299.7	468.23	433.2	256.4	298.1	360.096	229.147	251.896	297.6	142.228	98.3125	84.564	339.704	200.837	48.7101		88.938	80.631	102.06	81.12	140.306	70	85.6745	268.584	179.562	129.514	182.648	373.968	237.16	48.9985	60.7475	62.775	137.043	90.7321	22.683		502.6	160.44	321.5	86.25	295.245	224.325	194.122
10		557.8	975.3	824.5	172.1	455.21	321.44	511.2	467.5	260.22	311.7	387.6	245.8	297.4	312.4	196	116.058	95.8455	382.828	236.294	57.3096		88.938	84.5325	105.875	81.12	158.438	71.25	90.396	281.628	185.9	125.3	198.4	411.2	256.8	55.6875	71.25	73.728	146.278	98.8003	24.7001		526.2	164.2	334.5	88.7	335.67	265.9	235.2
11		627.328	1038.16	952.576	190.44	482.837	345.6	561.834	488.669	267.696	344.389	401.628	276.822	334.62	376.248	251.983	135.816	109.8	422.732	257.367	62.4206		88.938	84.5325	109.76	81.12	195.201	71.25	90.396	288.99	192.237	122.512	213.15	455.455	275.562	70	76.7295	99.825	157.229	107.87	26.9676		543.744	173.4	347.733	92.3355	407.932	293.327	262.132
12	Fifth injection	1146.88	1634	1120.97	228.096	641.845	366.912	615	689.585	401.157	492.993	466.97	287.65	387.6	399.2	332.82	167.936	132.962	559.563	398.619	96.6792		88.938	84.5325	109.76	81.12	233.28	71.25	90.396	292.032	192.237	122	225.7	516.7	328.4	75.429	97.216	128.774	171.11	123.154	30.7884		582.1	196.43	431.8	121.4	488.3	321.6	305.3
13		1263.24	2025.02	1330.42	271.472	938.975	523.45	630	722.137	414.304	523.45	617.4	304	423.612	419.71	392.85	194.208	149.987	655.544	487.219	118.168		98.784	95.506	119.422	87.079	260.11	85.6745	101.92	344.45	208.739	121.014	241.968	547.428	366.912	76.7295	117	128.774	187.594	133.894	33.4735		616.289	215.825	499.376	168.338	559.835	370.881	352.617
15	Six injection	1988.3	2444.3	1754.2	388.2	1834.3	876.3	876.3	754.3	422.3	573.2	1072.58	447.174	700	535	576.356	235.468	192.821	921.829	672.566	163.121		117	134.019	140.306	107.648	326.4	125.316	137.677	433.664	249.529	208.08	282.528	732.05	480.02	90.396	168.776	143.36	242.298	175.454	43.8634		775.284	264.654	612.06	216.302	817.216	432.45	529.984
[truncated: 61 more columns]

## Sheet: Figure 8C
NK wt Cw4	NK wt Cw7	NK PKCθCw4	NK DKO SHP-1 PKCθCw4	NK SHP-1 KO Cw4	NK S591D Cw4
124.353	59.0494	101.417	34.1993	43.4999	2.1624
148.671	51.8539	25.1708	28.4781	11.7849	4.32657
109.316	37.2942	66.5797	43.6722	35.804	4.36173
113.728	12.3492	50.0857	56.1021	13.3401	2.97943
53.698	16.3257	53.0923	30.1747	23.2339	16.8181
51.8104	42.9177	62.4799	16.8947	29.0899	4.35273
43.1389	17.8963	50.1481	26.6448	6.4404	5.36967
31.4853	10.6347	65.4324	25.2235	7.3176	25.2971
63.038	6.6951	25.6395	17.4127	18.3975	11.047
41.2913	6.3945	47.2229	18.3292	12.0416	12.157
30.4472	10.6937	46.7306	14.5782	12.2753	12.281
36.5046		45.9356	29.7206	24.8983	29.6691
		50.6059	13.4033		4.2924
		63.8144	20.5463		9.43733
		55.4269			7.81493

## Sheet: Figure 8D 
		WT/Cw4												WT/Cw7												YTS wt PKC theta siRNA/Cw4											YTS wt PKC theta siRNA/Cw7												YTS SHP-1 KO/Cw7
		Tumors volume(mm3)												Tumors volume(mm3)												Tumors volume(mm3)											Tumors volume(mm3)												Tumors volume(mm3)
		1	2	3	4	5	Average	S.D	S.E					1	2	3	4	5	Average	S.D	S.E					1	2	3	4	Average	S.D	S.E					1	2	3	4	5	Average	S.D	S.E					1
0	First injection	74.1285	63.6265	62.208	77.064	75.429	70.4912	7.0098	3.13488			0	First injection	48.4	49.368	44.528	47.5875	70.304	52.0375	10.3708	4.63798			0	First injection	58.8245	92.512	54.1205	62.208	66.9163	17.3831	8.69156			0	First injection	63.36	68.9265	70	68.9265	76.7295	69.5885	4.76534	2.13113			0	First injection	66.25
1		84.27	89.2375	83.106	87.48	84.27	85.6727	2.57377	1.15103			1		50.336	52.65	50.625	55.296	74.4385	56.6691	10.1295	4.53006			1		94.221	111.6	70.227	98.3125	93.5901	17.252	8.62598			1		93.775	81.461	87.48	107.911	107.648	95.655	11.8941	5.31919			1		67.5
3	Second injection	100.352	117.211	106.171	96.8	95.2875	103.164	8.8997	3.98007			3	Second injection	53.6625	56.074	55.016	58.8245	75.843	59.884	9.12048	4.0788			3	Second injection	134.946	128.993	84.564	140.899	122.35	25.6557	12.8279			3	Second injection	138.915	93.775	113.133	143.36	140.899	126.016	21.7611	9.73186			3	Second injection	75.712
4		133.956	134.946	137.216	124.653	122.793	130.713	6.52243	2.91692			4		81.461	78.416	80.0565	83.106	94.08	83.4239	6.20332	2.77421			4		152.1	149.987	117	178.538	149.406	25.2084	12.6042			4		154.213	117	132.962	154.213	154.213	142.52	16.9763	7.59203			4		87.725
5		199.119	189.216	207.831	140.899	221.154	191.644	30.6986	13.7288			5		113.133	97.216	89.2375	109.8	97.216	101.32	9.88835	4.42221			5		199.874	216.562	164.152	213.564	198.538	24.0475	12.0237			5		262.122	178.538	188.65	188.06	207.831	205.04	33.6359	15.0424			5		159.528
6	Third injection	277.725	321.726	306.561	216.302	340.605	292.584	48.4519	21.6684			6	Third injection	150.282	137.216	139.264	161.84	137.216	145.164	10.787	4.82408			6	Third injection	306.561	295.856	267.696	388.8	314.728	52.0305	26.0153			6	Third injection	494.606	237.16	307.031	267.696	388.129	338.924	103.808	46.4244			6	Third injection	265.6
7		367.84	437.712	419.476	328.738	437.712	398.296	48.275	21.5892			7		173.777	166.464	178.85	194.4	164.152	175.528	12.0605	5.39363			7		367.84	372.287	320.339	455.762	379.057	56.2828	28.1414			7		583.495	352.352	415.152	360.096	464.788	435.177	94.569	42.2925			7		292.783
8		479.232	556.973	535.553	428.126	494.951	498.967	50.3171	22.5025			8		219.375	191.558	208.088	222.188	194.4	207.122	13.9833	6.2535			8		474.624	465.408	427.432	550.854	479.579	51.7198	25.8599			8		664.042	470.45	530.452	451.25	545.753	532.389	83.5686	37.373			8		329.122
9	Forth injection	646.07	671.55	746.986	593.028	659.016	663.33	55.5087	24.8243			9	Forth injection	272.281	246.402	262.4	292.783	278.842	270.542	17.4327	7.79614			9	Forth injection	652.593	617.4	550.854	695.038	628.971	60.9893	30.4946			9	Forth injection	719.95	584.064	588.8	578.191	646.868	623.575	60.5412	27.0748			9	Forth injection	384.75
10		715.562	773.262	828.184	644.962	727.552	737.905	68.2737	30.5329			10		289.132	265.6	275.562	314.287	296.227	288.162	18.8171	8.41526			10		752.64	745.42	647.352	798.063	735.869	63.445	31.7225			10		900	617.98	677.217	622.913	740.096	711.641	116.317	52.0187			10		419.476
11		792.55	899.224	945.134	712.86	828.184	835.59	90.8557	40.6319			11		310.464	285.77	295.856	344.608	328.738	313.087	23.9192	10.697			11		853.013	941.707	701.8	905.06	850.395	105.536	52.7679			11		1073.15	671.277	753.371	695.038	835.029	805.573	162.361	72.6101			11		460.8
12	Fifth injection	951.385	1013.64	1081.66	827.544	915.062	957.86	96.5599	43.1829			12	Fifth injection	356.224	299.672	321.512	419.71	335.963	346.616	45.778	20.4726			12	Fifth injection	1045.57	1085.94	766.14	1004.67	975.579	143.514	71.7568			12	Fifth injection	1266.64	746.368	841.873	793.5	914.4	912.556	207.464	92.7809			12	Fifth injection	509.652
13		1204.22	1156.55	1313.22	1013.64	1229.39	1183.4	110.611	49.4666			13		410.828	348.174	409.909	499.851	379.456	409.644	56.6318	25.3265			13		1155.07	1252.75	913.385	1209.85	1132.76	151.619	75.8094			13		1492.14	885.063	929.703	952.576	1056.45	1063.19	247.903	110.866			13		589.472
14		1424.19	1360.75	1471.19	1209.85	1451.31	1383.46	105.613	47.2315			14		475.154	401.628	464.788	578.656	445.424	473.13	65.3635	29.2314			14		1339.54	1458.74	1088.71	1429.75	1329.18	168.161	84.0803			14		1708.51	1054.69	1132.3	1158.37	1247.94	1260.36	259.854	116.21			14		670.68
15	Six injection	1741.37	1587.39	1720.58	1543.9	1825.22	1683.69	115.686	51.7362			15	Six injection	561.816	493.972	550.854	689.098	550.854	569.319	72.0457	32.2198			15	Six injection	1608.41	1707.11	1361.65	1673.31	1587.62	156.116	78.0581			15	Six injection	1971.22	1340.96	1370.14	1390.21	1450.4	1504.58	263.918	118.028			15	Six injection	766.764
[truncated: 33 more columns]

## Sheet: Figure 8E
WT/Cw4	WT/Cw7	YTS wt PKC theta siRNA/Cw4	YTS wt PKC theta siRNA/Cw7	YTS SHP-1 KO PKC theta siRNA/Cw7	YTS SHP-1 S591D /Cw4	YTS SHP-1 S591D /Cw7	YTS SHP-1 KO/Cw7
111.149	34.2277	103.306	127.19	36.8983	22.7217	65.3448	46.7009
101.584	29.6403	107.64	84.8022	37.4069	26.1067	22.0725	33.4996
110.558	33.7551	87.1684	86.6758	34.5952	24.902	23.5013	41.6383
97.789	42.7674	107.407	88.0857	38.0534	23.4882	22.8528	41.0926
116.652	32.0367		91.578	36.7385
